# Supplementary material
Source: PubMed Central journal article supplement (PMC8152332)
Supplement: 13148_2021_1102_MOESM2_ESM.pdf [file 13148_2021_1102_MOESM2_ESM.pdf]

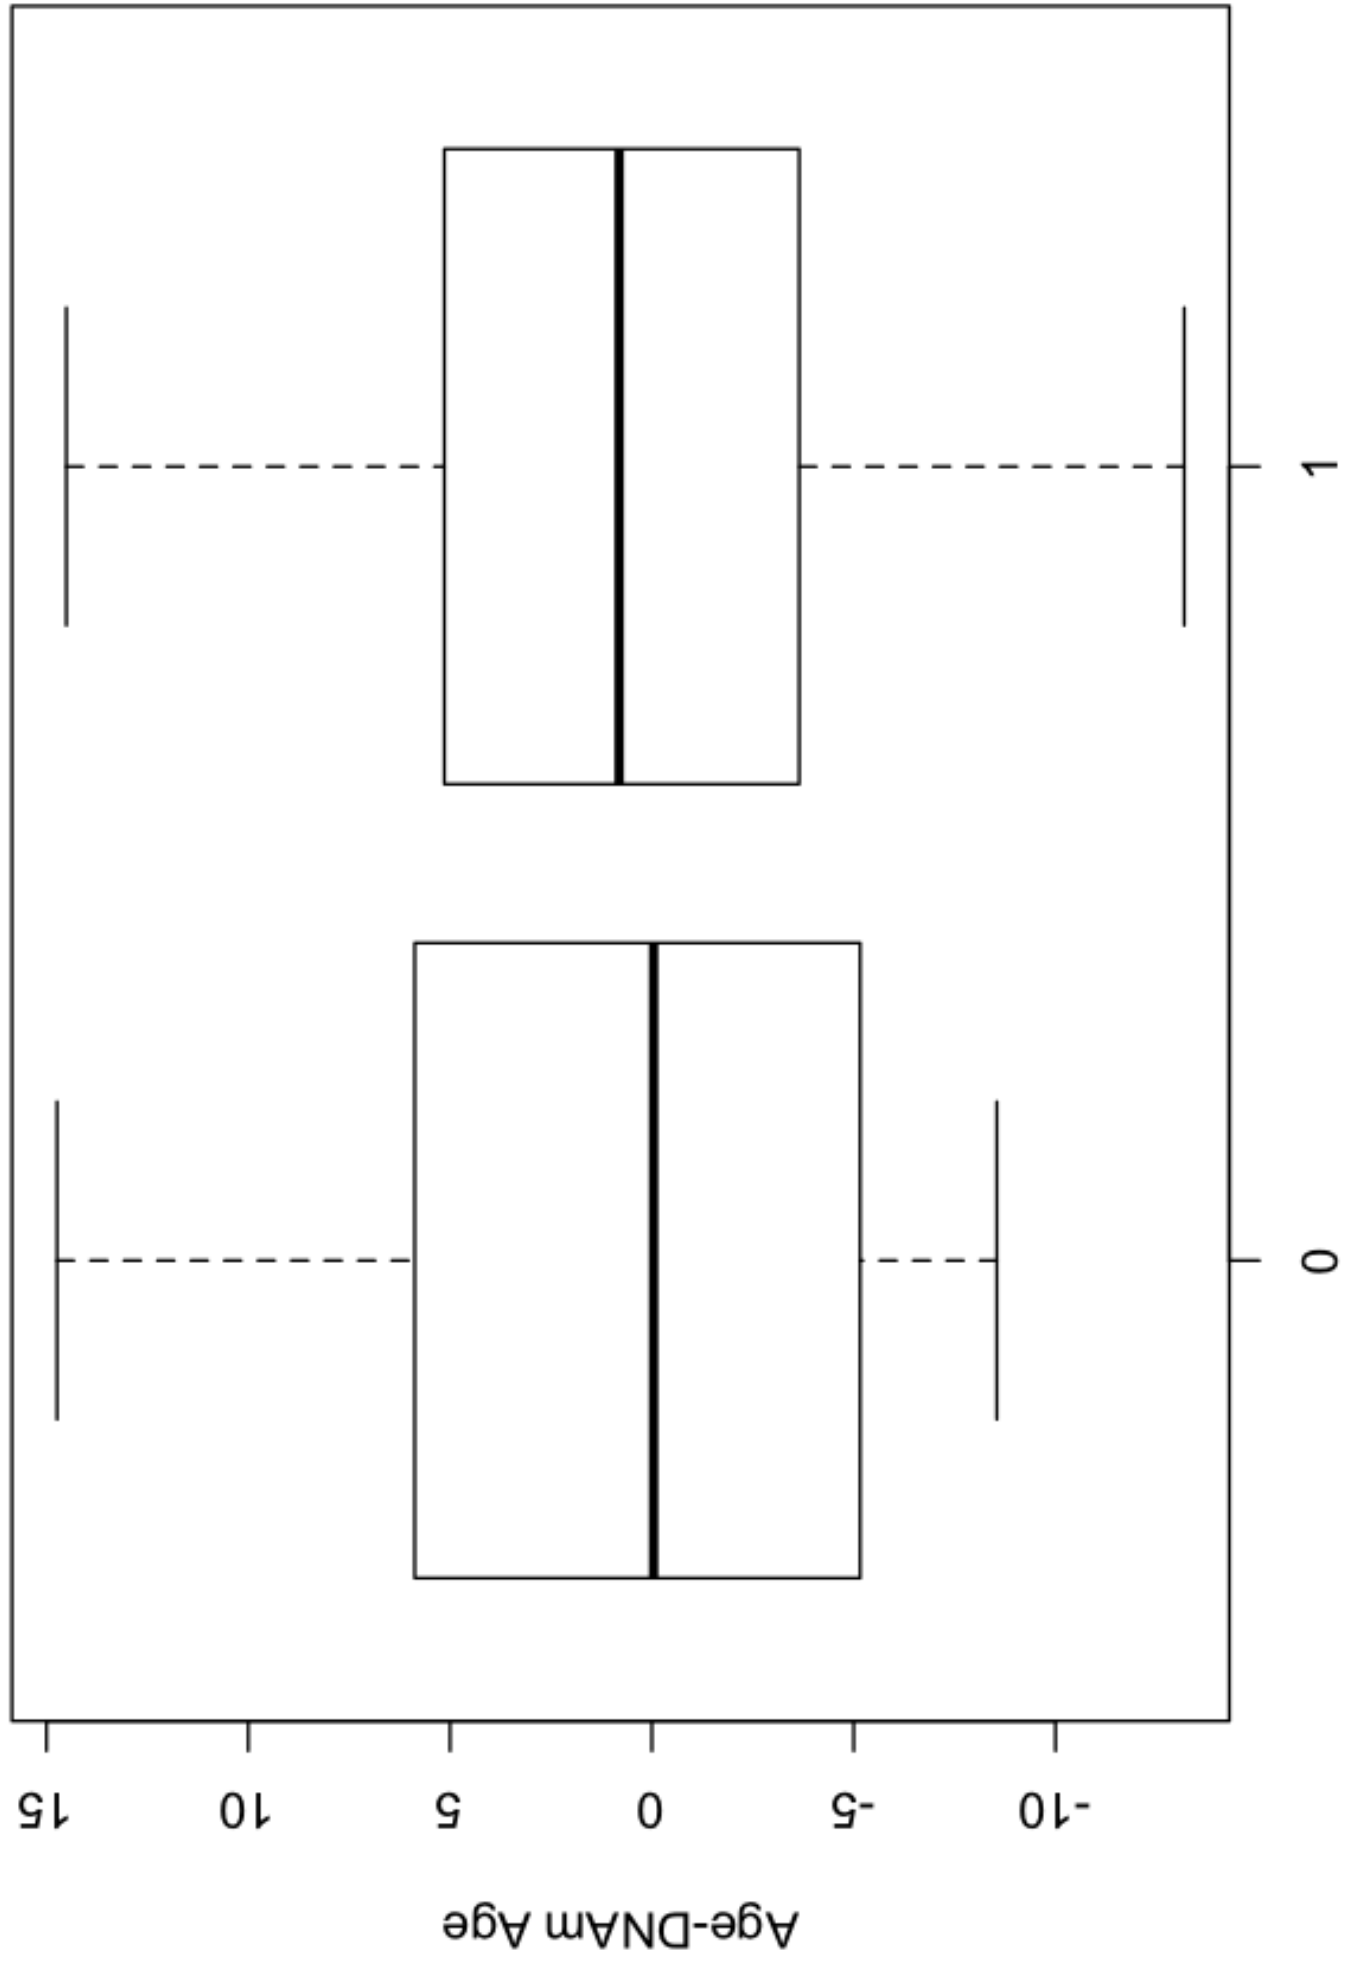

COVID
